# Supplementary material
Source: HighWire-hosted journal article supplement (https://www.annfammed.org/highwire/filestream/8180/field_highwire_adjunct_files/0/Ridd_Supp_Fig_and_Tables.pdf)
Supplement: Ridd_Supp_Fig_and_Tables.pdf [file Ridd_Supp_Fig_and_Tables.pdf]

Ridd MJ, Lewis G, Peters TJ, Salisbury C. The Patient-Doctor Depth-of-Relationship Scale: development and validation. *Ann Fam Med*. 2011;9(6):538-545.

<http://www.annfammed.org/content/9/6/538/DC1>

**Supplemental Figure 1. Test-retest data (Bland Altman plot).**

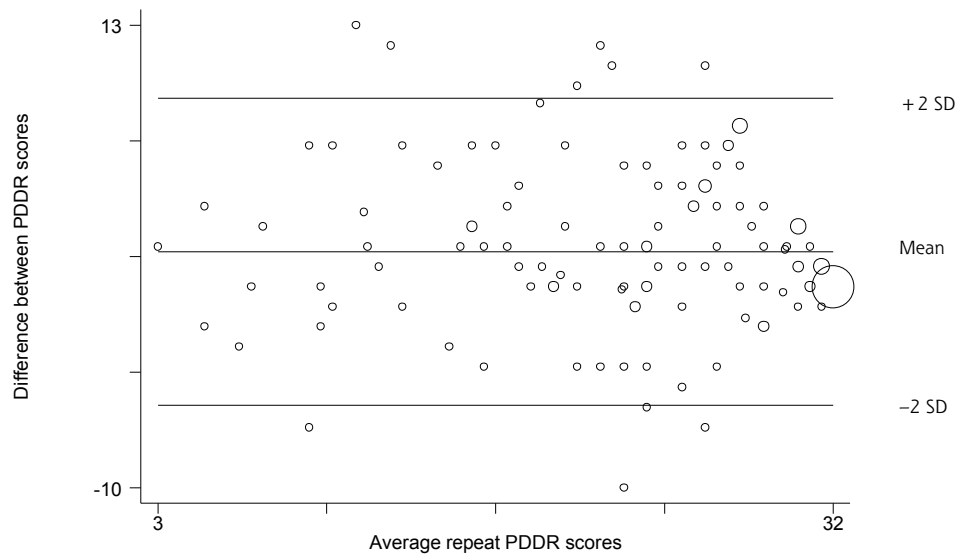

PDDR = Patient-Doctor Depth-of-Relationship.  
Note: The circle size reflects the number of overlapping scores.

ANNALS OF  
  
**FAMILY MEDICINE**  
**Online Supplementary Material**

Ridd MJ, Lewis G, Peters TJ, Salisbury C. The Patient-Doctor Depth-of-Relationship Scale: development and validation. *Ann Fam Med*. 2011;9(6):538-545.

<http://www.annfammed.org/content/9/6/538/DC1>

**Supplemental Table 1. Pilot Round 1 Of Patient-Doctor Depth-of-Relationship Questionnaire Development: Varimax Rotation 2-Factor Solution Using Principal Factors**

| Item No | Text                                                         | Factor        |               | Uniqueness <sup>a</sup> |
|---------|--------------------------------------------------------------|---------------|---------------|-------------------------|
|         |                                                              | 1             | 2             |                         |
| 1       | I know this doctor                                           | 0.2871        | <b>0.8348</b> | 0.2206                  |
| 2       | This doctor knows my background                              | 0.3125        | <b>0.8207</b> | 0.2287                  |
| 3       | This doctor knows my home life                               | 0.2148        | <b>0.8412</b> | 0.2462                  |
| 4       | I get on with this doctor                                    | 0.6017        | 0.5327        | 0.3541                  |
| 5       | This doctor knows me as a person                             | 0.3300        | <b>0.8254</b> | 0.2099                  |
| 6       | This doctor knows what works for me                          | 0.4078        | <b>0.7699</b> | 0.2409                  |
| 7       | This doctor knows how I feel about things                    | 0.3836        | <b>0.7582</b> | 0.2779                  |
| 8       | I know what to expect with this doctor                       | 0.4610        | <b>0.7260</b> | 0.2604                  |
| 9       | This doctor supports me                                      | 0.6288        | 0.5680        | 0.2821                  |
| 10      | This doctor understands how my problem(s) affect me          | 0.6123        | 0.5468        | 0.3260                  |
| 11      | This doctor really cares for me                              | <b>0.7351</b> | 0.3930        | 0.3053                  |
| 12      | There is a strong bond between me and this doctor            | 0.6172        | 0.5684        | 0.2960                  |
| 13      | I can totally depend on this doctor                          | <b>0.7229</b> | 0.4474        | 0.2773                  |
| 14      | This doctor feels completely relaxed with me                 | <b>0.7561</b> | 0.3423        | 0.3112                  |
| 15      | This doctor takes me seriously                               | <b>0.7984</b> | 0.2457        | 0.3022                  |
| 16      | I can be myself with this doctor                             | <b>0.8136</b> | 0.2682        | 0.2661                  |
| 17      | This doctor tries hard to work with me                       | <b>0.8003</b> | 0.3406        | 0.2435                  |
| 18      | This doctor knows exactly what to expect with me             | 0.5763        | 0.5993        | 0.3086                  |
| 19      | I have complete confidence in this doctor                    | <b>0.8024</b> | 0.3310        | 0.2466                  |
| 20      | This doctor accepts me the way I am                          | <b>0.7221</b> | 0.3205        | 0.3759                  |
| 21      | This doctor knows me inside-out                              | 0.4505        | <b>0.6985</b> | 0.3091                  |
| 22      | I feel totally relaxed with this doctor                      | <b>0.8237</b> | 0.2834        | 0.2412                  |
| 23      | My rapport with this doctor is                               | <b>0.7604</b> | 0.4154        | 0.2491                  |
| 24      | This doctor's dedication to my care is                       | <b>0.8209</b> | 0.3742        | 0.1861                  |
| 25      | My trust in this doctor is                                   | <b>0.8202</b> | 0.3731        | 0.1880                  |
| 26      | This doctor's respect for me is                              | <b>0.8077</b> | 0.3802        | 0.2030                  |
| 27      | My relationship with this doctor is                          | <b>0.7689</b> | 0.4501        | 0.2062                  |
| 28      | This doctor's trust in me is                                 | <b>0.7792</b> | 0.3909        | 0.2401                  |
| 29      | My respect for this doctor is                                | <b>0.8030</b> | 0.3515        | 0.2316                  |
| 30      | If I need to see a doctor, I try to see this one             | 0.5558        | 0.4684        | 0.4717                  |
| 31      | I would forgive this doctor if he/she made a genuine mistake | <b>0.5158</b> | 0.3351        | 0.6216                  |
| 32      | I would be very concerned if this doctor left                | <b>0.6246</b> | 0.4821        | 0.3775                  |

Note: numbers in boldface indicate factor alignment.  
<sup>a</sup> Proportion of the common variance of the variable not associated with the factors (1–communality).

ANNALS OF  
  
**FAMILY MEDICINE**  
**Online Supplementary Material**

Ridd MJ, Lewis G, Peters TJ, Salisbury C. The Patient-Doctor Depth-of-Relationship Scale: development and validation. *Ann Fam Med*. 2011;9(6):538-545.

<http://www.annfammed.org/content/9/6/538/DC1>

**Supplemental Table 2. Pilot Round 2 of Patient-Doctor Depth-of-Relationship Questionnaire Development: Varimax Rotation 2-Factor Solution Using Principal Factors**

| Item No | Text                                                         | Factor        |               | Uniqueness <sup>a</sup> |
|---------|--------------------------------------------------------------|---------------|---------------|-------------------------|
|         |                                                              | 1             | 2             |                         |
| 1       | I know this doctor very well                                 | <b>0.8678</b> | 0.3029        | 0.1552                  |
| 2       | This doctor knows me as a person                             | <b>0.8924</b> | 0.2513        | 0.1405                  |
| 3       | This doctor really knows how I feel about things             | <b>0.7941</b> | 0.3571        | 0.2419                  |
| 4       | I know what to expect with this doctor                       | <b>0.8616</b> | 0.3463        | 0.1377                  |
| 5       | This doctor really cares for me                              | 0.4230        | <b>0.7199</b> | 0.3028                  |
| 6       | This doctor takes me seriously                               | 0.3260        | <b>0.8507</b> | 0.1701                  |
| 7       | This doctor accepts me the way I am                          | 0.3537        | <b>0.7596</b> | 0.2978                  |
| 8       | I feel totally relaxed with this doctor                      | 0.3453        | <b>0.8062</b> | 0.2309                  |
| 9       | I would forgive this doctor if he/she made a genuine mistake | 0.1976        | 0.5037        | 0.7072                  |
| 10      | I would be very sorry if this doctor left                    | 0.4953        | 0.6181        | 0.3726                  |

Note: numbers in boldface indicate factor alignment.  
<sup>a</sup> Proportion of the common variance of the variable not associated with the factors (1–communality).
